# Supplementary material for: Metabolic tradeoffs and heterogeneity in microbial responses to temperature determine the fate of litter carbon in a warmer world
Source: Copernicus journal article supplement (doi:10.5194/bg-2019-269), 2019-07-26
Supplement: Supplementary file 1 [file bg-2019-269-supplement.pdf]

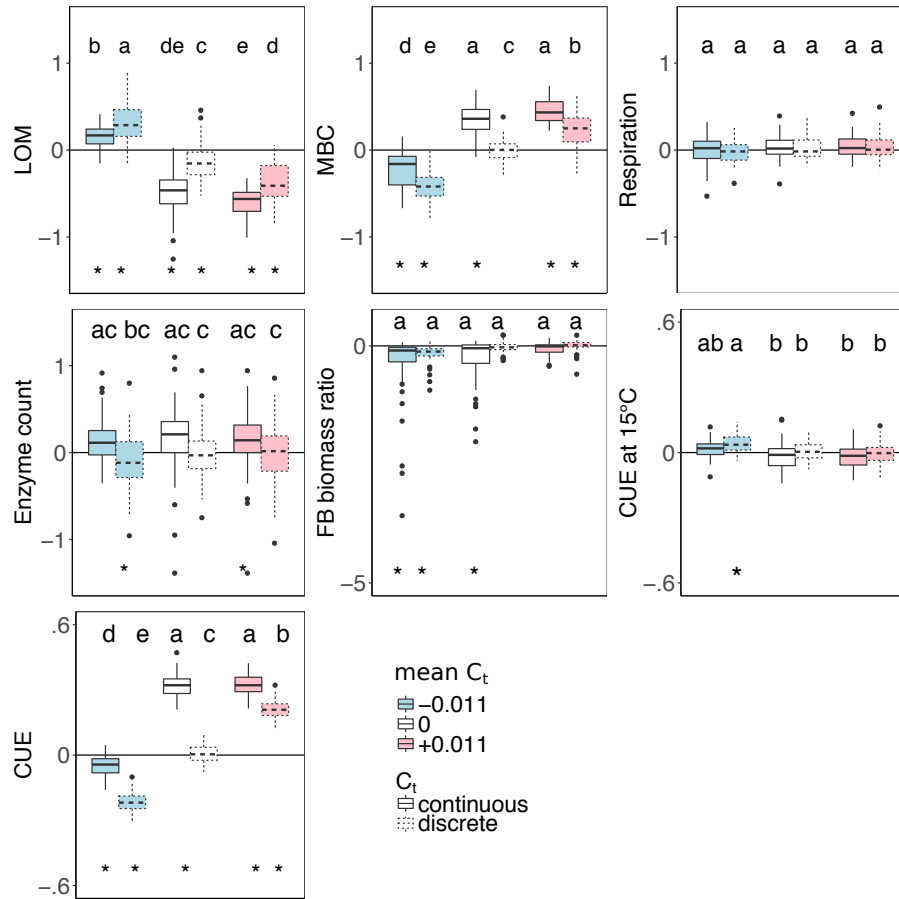

**Figure S1.** Effect of 5°C warming on C stocks and flows in simulations, reported as the natural log of the ratio of the values in heated compared to control conditions. Here, the CUE temperature response is allowed to vary (heterogeneous) or is fixed (homogeneous) at the mean cross-taxon value as in Figure 3, but the variability is either constrained to all negative values (mean of  $-0.011\text{ }^{\circ}\text{C}^{-1}$ ; range  $-0.022$  to  $0^{\circ}\text{C}^{-1}$ ), or all positive values (mean of  $0.011\text{ }^{\circ}\text{C}^{-1}$ ; range  $0$  to  $0.022^{\circ}\text{C}^{-1}$ )

**Table S1.** Effect of changing the reference CUE and enzyme costs against CUE on the stability and conceivability of DEMENT outputs under three warming scenarios. CUE\_ref is the CUE at 15°C, prior to calculating enzyme costs. C<sub>i</sub> describes whether CUE is homogeneous or heterogeneous between taxa. CUE\_enz is the maximum cost against CUE for enzyme production (with transporter costs parameterized the same). Stable is the fraction of runs where the microbial community constrained litter accumulation until the end. The median MBC, SOC:MBC ratio, and SOC are shown, along with the biomass-weighted CUE of the active community at the end of this time. CN, CP, and NP refer to median elemental ratios of microbial biomass. Italicized values are those not deemed to be within the range of biologically plausible values.

| CUE_ref | C <sub>i</sub> | Temperature | CUE_enz | Stable | MedianMBC | Median SOC:MBC | Median SOC  | Final CUE | CN  | CP | NP  |
|---------|----------------|-------------|---------|--------|-----------|----------------|-------------|-----------|-----|----|-----|
| 0.58    | homogeneous    | H           | -0.1    | 0.71   | 57        | <i>3.4</i>     | 198         | 0.44      | 4.5 | 49 | 9.3 |
|         | NA             | C           | -0.1    | 0.97   | 67        | <i>2.3</i>     | 142         | 0.41      | 4.6 | 43 | 9.3 |
|         | heterogeneous  | H           | -0.1    | 0.86   | 107       | <i>1.4</i>     | 144         | 0.53      | 4.7 | 43 | 9   |
| 0.48    | homogeneous    | H           | -0.1    | 0.98   | 36        | 9.2            | 331         | 0.32      | 4.5 | 43 | 9.4 |
|         | NA             | C           | -0.1    | 0.93   | 37        | 7.6            | 241         | 0.31      | 4.3 | 39 | 9.1 |
|         | heterogeneous  | H           | -0.1    | 0.9    | 70        | <i>2.1</i>     | 137         | 0.42      | 4.6 | 42 | 9.3 |
| 0.48    | homogeneous    | H           | -0.2    | 0.64   | 20        | 54             | <i>1041</i> | 0.23      | 4.5 | 41 | 9.2 |
|         | NA             | C           | -0.2    | 0.81   | 18        | <i>131</i>     | 687         | 0.15      | 3.6 | 35 | 9.5 |
|         | heterogeneous  | H           | -0.2    | 0.97   | 34        | 19             | 325         | 0.26      | 3.9 | 37 | 9.3 |
| 0.38    | homogeneous    | H           | -0.1    | 0.95   | 20        | 32             | 637         | 0.23      | 4.4 | 39 | 9   |
|         | NA             | C           | -0.1    | 0.95   | 20        | 33             | 492         | 0.22      | 3.8 | 37 | 9.3 |
|         | heterogeneous  | H           | -0.1    | 0.98   | 38        | 7.2            | 219         | 0.32      | 4.1 | 38 | 9.2 |

**Table S2.** Median (or median-standardized interquartile range (IQRm)) output values for DEMENT model runs where  $C_t$  was either always positive, or always negative, marked according to warming effect (+/-) and model structure effects (letters) determined using Bonferoni-corrected post-hoc tests following linear mixed effect models. Symbols: "+" warming increased value; "-" warming decreased value). Letters: differences between warmed scenarios. In some instances, values differ slightly from those in Table 1 because some seeds failed to lead to constrained LOM accumulation and so were removed here.

| Figure 1 scenario<br>$C_t$ ( $^{\circ}\text{C}^{-1}$ ) | $A_i$<br>-0.011 | G<br>-0.022 to 0 | $A_{ij}$<br>+0.011 | H<br>0 to 0.011 |
|--------------------------------------------------------|-----------------|------------------|--------------------|-----------------|
| LOM IQRm                                               | 0.29            | 0.23             | 0.21               | 0.30            |
| SOM IQRm                                               | 0.26            | 0.15             | 0.21               | 0.19            |
| Surviving taxa                                         | 11a+            | 9b               | 10a                | 8b              |
| Enzyme count                                           | 16.5b           | 19a              | 15b-               | 18a             |
| Shannon's H                                            | 1.92a           | 1.61a            | 1.86ac             | 1.64bc-         |
| MBC ( $\text{mg cm}^{-3}$ )                            | 26.5b+          | 32.3a+           | 13.6d-             | 17.2c-          |
| LOM ( $\text{mg cm}^{-3}$ )                            | 411.5c-         | 334.6d-          | 841.8a+            | 706.5b+         |
| CUE at $15^{\circ}\text{C}$                            | 0.23bc          | 0.23c            | 0.24a+             | 0.23b           |
| CUE at $20^{\circ}\text{C}$                            | 0.29b+          | 0.32a+           | 0.19d-             | 0.22c-          |
| FB biomass ratio                                       | 0.85a           | 0.81ac           | 0.73bc             | 0.68b           |
| Respiration ( $\text{mg cm}^{-3} \text{ day}^{-1}$ )   | 0.94c           | 0.96ac           | 0.90b              | 0.94abc         |
| FB richness ratio                                      | 0.51a           | 0.46ac           | 0.40bc             | 0.43ac          |
| CUE bacteria                                           | 0.27b           | 0.36a+           | 0.27b              | 0.25c-          |
| CUE fungus                                             | 0.22c           | 0.29a+           | 0.23b+             | 0.18d-          |
